# Supplementary material for: Measuring individual differences in cognitive abilities in the lab and on the web
Source: PLoS One. 2019 Dec 11;14(12):e0226217. doi: 10.1371/journal.pone.0226217 (PMC6905613; doi:10.1371/journal.pone.0226217)
Supplement: S1 Dataset — (CSV) [file pone.0226217.s001.csv]

Participant	Participant_InLab	InLab_CVMT_D_scores	InLab_MLAT5_scores	InLab_AOSpan_scores	Participant_Online	Online_CVMT_D_scores	Online_MLAT5_scores	Online_AOSpan_scores	Gender	Nationality	Age	Native_language1	Native_language2	Self-rated_English_proficiency	Days	educational_level
participant_001	InLab_001	1.628	19	23	Online_001	1.93	20	39	female	German	31	German		advanced	49	graduate
participant_002	InLab_002	1.984	15	12	Online_002	1.365	10	7	male	German	23	German		advanced	56	graduate
participant_003	InLab_003	1.701	17	47	Online_003	1.927	17	49	female	German	28	German		advanced	53	graduate
participant_004	InLab_004	2.008	8	19	Online_004	1.782	19	22	male	German	28	German		advanced	51	graduate
participant_005	InLab_005	1.803	11	4	Online_005	2.046	19	16	female	Argentinian	37	Spanish		advanced	48	graduate
participant_006	InLab_006	1.039	19	46	Online_006	2.076	23	28	female	German	25	German		advanced	51	graduate
participant_007	InLab_007	1.425	13	39					male	German	34	German		advanced		graduate
participant_008	InLab_008	1.911	24	12	Online_008	2.244	24	10	male	German	30	German		advanced	52	graduate
participant_009	InLab_009	2.151	24	34	Online_009	2.361	24	31	female	Chinese	22	Chinese		advanced	46	graduate
participant_010	InLab_010	2.639	16	24	Online_010	2.266	19	21	female	German	29	German		advanced	52	graduate
participant_011	InLab_011	2.049	23	5	Online_011	1.825	23	7	female	German	24	German		advanced	50	undergraduate
participant_01112	InLab_01112	2.312	23	44	Online_0112	3.554	24	55	female	Russian	28	Russian		advanced	47	graduate
participant_013	InLab_013	2.251	21	24					female	German	26	German		advanced		graduate
participant_014	InLab_014	1.562	9	12	Online_014	2.462	5	13	female	German	32	German		advanced	48	graduate
participant_015	InLab_015	2.064	22	17	Online_015	2.203	24	33	male	German	29	German		advanced	44	graduate
participant_016	InLab_016	1.683	14	16	Online_016	2.447	11	32	female	Chilean	33	Spanish		advanced	45	graduate
participant_017	InLab_017	1.354	9	23	Online_017	1.099	18	12	female	Russian	27	Russian		advanced	43	graduate
participant_018	InLab_018	2.202	21	21	Online_018			29	female	Iranian	28	Persian		advanced		graduate
participant_019	InLab_019	2.877	18	27	Online_019	2.569	15	34	female	Chinese	23	Chinese		intermediate	47	graduate
participant_020	InLab_020	1.703	21	27	Online_020	1.876	24	44	female	German	25	German		advanced	48	undergraduate
participant_021	InLab_021	1.896	17	30	Online_021		17	31	female	German	23	German		advanced	50	undergraduate
participant_022	InLab_022	1.64	23	42	Online_022	2.151	24	30	female	German	27	German		intermediate	45	graduate
participant_023	InLab_023	2.138	16	32	Online_023	2.685	18	38	female	German	30	Vietnamese	German	advanced	43	undergraduate
participant_024	InLab_024	1.844	24	17	Online_024	1.796	24	26	female	German	24	German		advanced	42	graduate
participant_025	InLab_025	2.393	24	15	Online_025	3.201	24	27	female	German	30	Russian	German	advanced	44	undergraduate
participant_026	InLab_026	1.963	23	40	Online_026	2.877	24	43	female	German	23	German		advanced	44	undergraduate
participant_027	InLab_027	1.943	19	7	Online_027	2.311	21	18	female	German	28	German		intermediate	47	graduate
participant_028	InLab_028	2.809	22	25	Online_028	3.929	23	16	female	German	29	German		advanced	43	graduate
participant_029	InLab_029	2	15	23	Online_029	2.53	16	28	female	Hungarian	28	Hungarian		advanced	42	graduate
participant_030	InLab_030	2.117	15	19					female	German	24	German		intermediate		undergraduate
participant_031	InLab_031	2.292	20	23	Online_031	3.274	21	39	female	German	30	German		advanced	43	undergraduate
participant_032	InLab_032	2.397	6	8	Online_032	2.959	6	8	male	German	29	German		advanced	42	undergraduate
participant_033	InLab_033	2.277	23	53	Online_033	1.4	13	54	female	German	23	German		intermediate	49	graduate
participant_034	InLab_034	1.172	12	6					male	German	23	German		advanced		undergraduate
participant_035	InLab_035	0.974	10	20	Online_035	2.124	15	24	female	German	24	German	Romanian	intermediate	46	undergraduate
participant_036	InLab_036	1.772	24	23	Online_036	1.777	24	20	female	German	19	German		advanced	45	undergraduate
participant_037	InLab_037	3.058	24	57	Online_037	3.758	24	75	male	Serbian	18	Serbian	English	advanced	46	undergraduate
participant_038	InLab_038	2.061	16	35					female	German	19	German		advanced		undergraduate
participant_039	InLab_039	3.089	24	29	Online_039	2.673	24	33	female	German	21	German		advanced	44	undergraduate
participant_040	InLab_040		24	38	Online_040	1.991	24	53	male	German	20	German		advanced	40	undergraduate
participant_041	InLab_041	1.449	4	21	Online_041		3	10	female	German	29	German	Turkish	advanced	40	undergraduate
participant_042	InLab_042	2.138	24	38	Online_042	1.953	24	58	female	American	23	English		advanced	48	undergraduate
participant_043	InLab_043	1.935	18	21					male	German	22	German		intermediate		undergraduate
participant_044	InLab_044	2.12	17	10	Online_044	1.591	18	17	male	Kazakhstani	25	Russian		advanced	41	undergraduate
participant_045	InLab_045	2.203	13	24					female	German	23	German		advanced		undergraduate
participant_046	InLab_046	1.778	23	21	Online_046	1.791	23	25	male	German	29	German		advanced	39	graduate
participant_047	InLab_047	1.592	18	35	Online_047	2.702	22	33	male	German	37	German		advanced	44	graduate
participant_048	InLab_048	2.49	24	59	Online_048	2.437	24	46	female	German	21	German		advanced	39	undergraduate
participant_049	InLab_049	1.699	12	20	Online_049	1.663	11	16	female	Venezuelan	36	Spanish		intermediate	39	graduate
participant_050	InLab_050	1.906	15	22	Online_050	2.199	16	31	female	German	22	German		intermediate	43	undergraduate
